# Supplementary material
Source: PubMed Central journal article supplement (PMC4024846)
Supplement: Supp_Fig2.pdf [file Supp_Fig2.pdf]

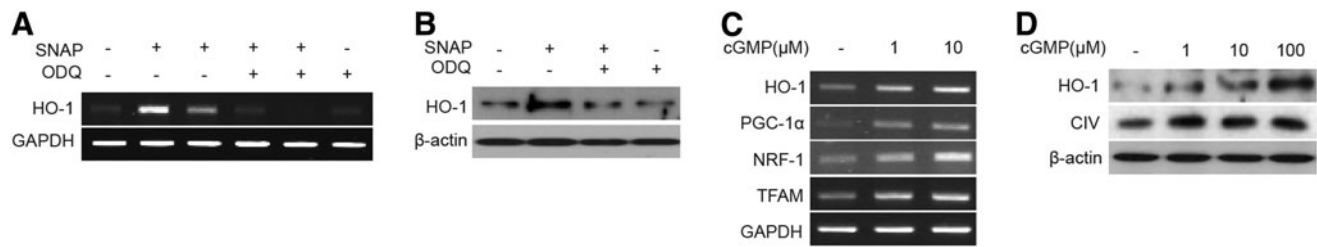

**SUPPLEMENTARY FIG. S2. NO induces HO-1 expression through cGMP-dependent pathway.** (A, B) HepG2 cells were pretreated in the absence or presence of ODQ (1  $\mu$ M), an inhibitor of sGC, and then treated with SNAP (100  $\mu$ M) for 12 h. (A) HO-1 mRNA levels (B) HO-1 protein (C, D) HepG2 cells were treated with the indicated concentrations of 8-Br-cGMP (cGMP) for 12 h. (C) PGC-1 $\alpha$ , NRF-1, TFAM, and HO-1 mRNA levels. (D) CIV (complex IV) and HO-1 protein levels. All experiments were performed in triplicate, and representative data are shown. GAPDH and  $\beta$ -actin were used as a loading control in each experiment. 8-Br-cGMP, 8-bromoguanosine 3',5'-cyclic monophosphate; cGMP, guanosine 3',5'-monophosphate; GAPDH, glyceraldehyde 3-phosphate dehydrogenase; ODQ, 1H-[1,2,4]oxadiazolo[4,3-a]quinoxalin-1-one; sGC, soluble guanylate cyclase.
