# Supplementary material
Source: PubMed Central journal article supplement (PMC4024846)
Supplement: Supp_Fig5.pdf [file Supp_Fig5.pdf]

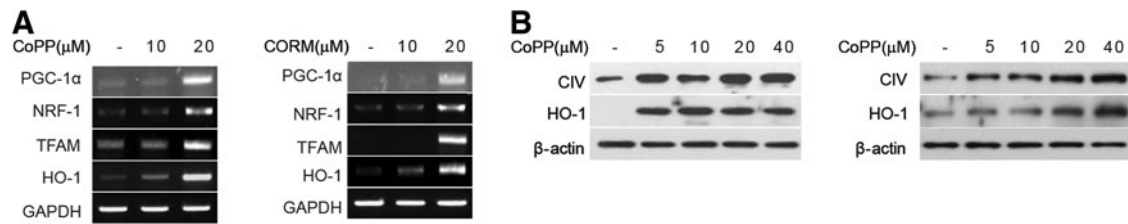

**SUPPLEMENTARY FIG. S5. CO directly activates mitochondrial biogenesis associated transcriptional coactivators and increases mtDNA and protein.** (A, B) HepG2 cells were treated with the indicated concentrations of CoPP or CORM-3 for 12 h (A) Expression of PGC-1 $\alpha$ , NRF-1, TFAM, and HO-1 were measured by RT-PCR. (B) Expression level of CIV (complex IV) and HO-1 were analyzed by western blotting. All experiments were performed thrice independently, and representative data are shown. GAPDH and  $\beta$ -actin were used as a loading control in each experiment. CoPP, cobalt protoporphyrin; CORM-3, CO-releasing molecule-3.
