# Supplementary material
Source: PubMed Central journal article supplement (PMC4024846)
Supplement: Supp_Fig6.pdf [file Supp_Fig6.pdf]

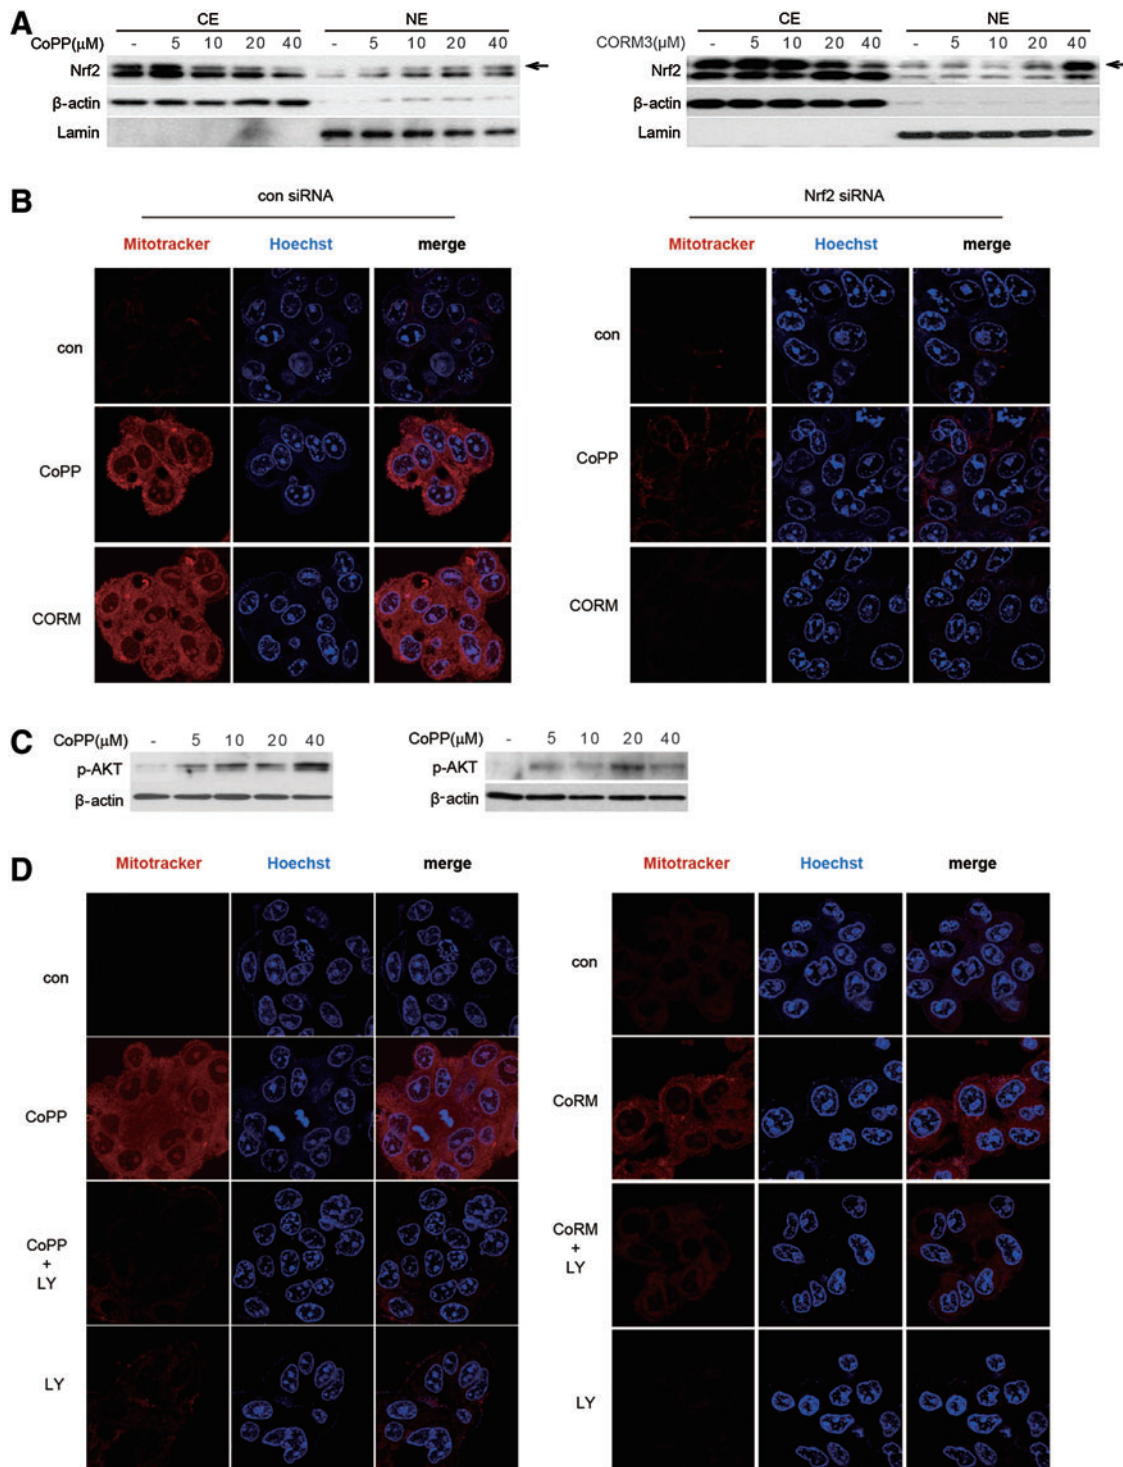

**SUPPLEMENTARY FIG. S6. Nrf2-Akt activation is involved in mitochondrial biogenesis induced by HO-1/CO system.** HepG2 cells were treated with the indicated concentrations of CoPP or CORM-3 for 12 h. (A) Nuclear translocation of Nrf2 was assayed by western blotting. Cell lysates were divided into cytosolic and nuclear fractions. Lamin and was used a marker of nuclear fractions. (B) HepG2 cells were transfected with control siRNA (con) or Nrf2 siRNA to knockdown Nrf2 levels. Cells were treated with 20  $\mu$ M CoPP or 20  $\mu$ M CORM for 12 h. Mitochondrial mass was assessed by using MitoTracker Red CMXRos staining (red). Nuclei were stained with Hoechst dye (blue). (C) Akt phosphorylation at S473 was determined by western blotting. (D) HepG2 cells were treated with 20  $\mu$ M CoPP or 20  $\mu$ M CORM-3 for 12 h after pretreatment in the absence or presence of 25  $\mu$ M LY (LY294002), a PI-3K/Akt inhibitor. Fluorescence intensity of MitoTracker Red (red) and Hoechst (blue). All experiments were performed thrice independently, and representative data are shown. Nrf2, NF-E2-related factor-2.
