# Supplementary material
Source: PubMed Central journal article supplement (PMC4024846)
Supplement: Supp_Fig8.pdf [file Supp_Fig8.pdf]

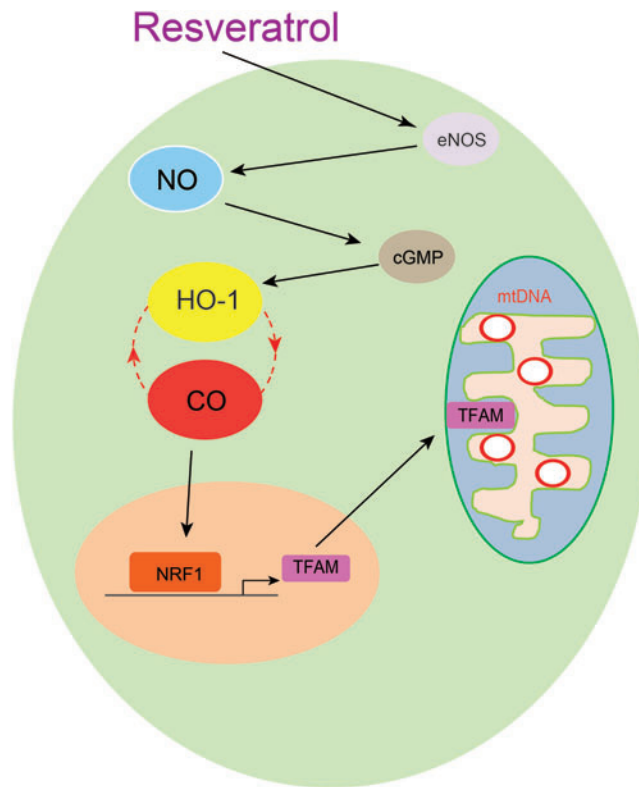

**SUPPLEMENTARY FIG. S8. Schematic diagram of proposed pathways.** Natural antioxidants such as resveratrol can induce mitochondrial biogenesis through a complex cascade involving the sequential activation of eNOS (NO) and HO-1 (CO). It depends on a complex sequential interplay of signaling mediators, beginning with stimulation of the eNOS/cGMP axis, followed by HO-1 expression, HO activity, and CO production.
